# Supplementary material for: Characterization of the serum metabolome following radiation treatment in patients with high-grade gliomas
Source: Springer Nature journal article supplement (doi:10.1186/s13014-016-0626-6), 2016-04-02
Supplement: MOESM1 [file 10027714]

**Table S1.** Identified metabolites in serum, tumor and BAT that were found affected by radiotherapy. Tumor and BAT samples were collected by microdialysis.

| Metabolite                   | Corr. Serum | Corr.Tumor | Corr.BAT |
|------------------------------|-------------|------------|----------|
| <b>Essential amino acids</b> |             |            |          |
| Lysine                       | ↓           |            |          |
| Methionine                   | ↓*          |            |          |
| Phenylalanine                | ↓           |            |          |
| Threonine                    | ↓*          |            |          |
| Valine                       | ↓           |            |          |
| <b>Amino acids</b>           |             |            |          |
| Alanine                      |             | ↑*         |          |
| Aminomalonic acid            | ↓           |            |          |
| Arginine                     | ↓*          |            |          |
| Asparagine                   | ↓*          |            |          |
| Cystathionine                |             |            | ↑*       |
| Cysteine                     | ↓           |            |          |
| Glutamate                    | ↓           | ↑          | ↑        |
| Glutamine                    | ↓*          | ↑          | ↑*       |
| Glycine                      | ↓           |            |          |
| Ornithine                    | ↓*          | ↓*         | ↓        |
| Pyroglutamic acid            |             |            |          |
| Tryptophan                   | ↓           |            |          |
| Tyrosine                     | ↓*          | ↓          |          |
| <b>Alcohols</b>              |             |            |          |
| Arabitol                     |             |            | ↑*       |
| Ethanolamine                 |             | ↓          | ↑*       |
| Glycerol-3-phosphate         | ↓*          |            |          |
| myo-Inositol                 | ↓           | ↑*         |          |
| Ribitol                      |             |            |          |
| <b>Fatty Acids</b>           |             |            |          |
| Arachidonic acid             | ↓           |            |          |
| Butanoic acid                | ↓*          |            |          |
| Linoleic acid                | ↓*          |            |          |
| Octadecanoic acid            | ↓           | ↑*         | ↓        |
| Oleic/Elaidic acid           | ↓*          |            |          |
| <b>Saccharides</b>           |             |            |          |
| Arabinose                    |             | ↓          | ↑*       |
| Fructose                     |             |            | ↑        |
| Galactose                    |             | ↓          |          |
| Glucose                      |             |            | ↑        |
| Glucopyranose (glucose?)     |             |            | ↑        |
| Lactulose                    |             |            | ↑        |
| beta-D-Methylglucopyranoside | ↓*          |            |          |
| Nigerose                     |             | ↑*         |          |
| Palatinose                   |             |            | ↑        |
| Trehalose                    |             |            | ↑        |
| Xylulose                     |             | ↑*         |          |
| <b>Citric acid cycle</b>     |             |            |          |
| Citric acid                  | ↑           |            | ↑*       |
| Succinic acid                |             |            | ↓        |
| <b>Misc</b>                  |             |            |          |
| Chlorobenzoic acid           |             | ↑          | ↑        |
| Creatinine                   | ↓*          |            | ↑        |
| Dehydroascorbic acid dimer   | ↑           |            |          |
| Glutaric acid                |             | ↑          |          |
| Glyceric acid                | ↓*          |            | ↑        |
| Glycerol                     |             |            | ↑*       |
| Itaconic acid                |             | ↑          | ↑*       |
| Pentonic acid                |             |            | ↑*       |
| Phosphoric acid              |             |            |          |
| S-Methyl-L-Cysteine          |             | ↓          |          |
| Urea                         | ↓           | ↓          | ↑        |

Corr. Serum, Corr.Tumor and Corr.BAT represent the correlation to treatment. ↑ denotes increased levels and ↓ denotes decreased levels following treatment. \* = p < 0.05 calculated with a Student's t-test.
